# Supplementary material for: Regulation of angiotensin II actions by enhancers and super-enhancers in vascular smooth muscle cells
Source: PubMed Central journal article supplement (PMC5684340; doi:10.1038/s41467-017-01629-7), 2017-11-13
Supplement: 41467_2017_1629_MOESM1_ESM.pdf [file 41467_2017_1629_MOESM1_ESM.pdf]

## Supplementary Figures and Tables

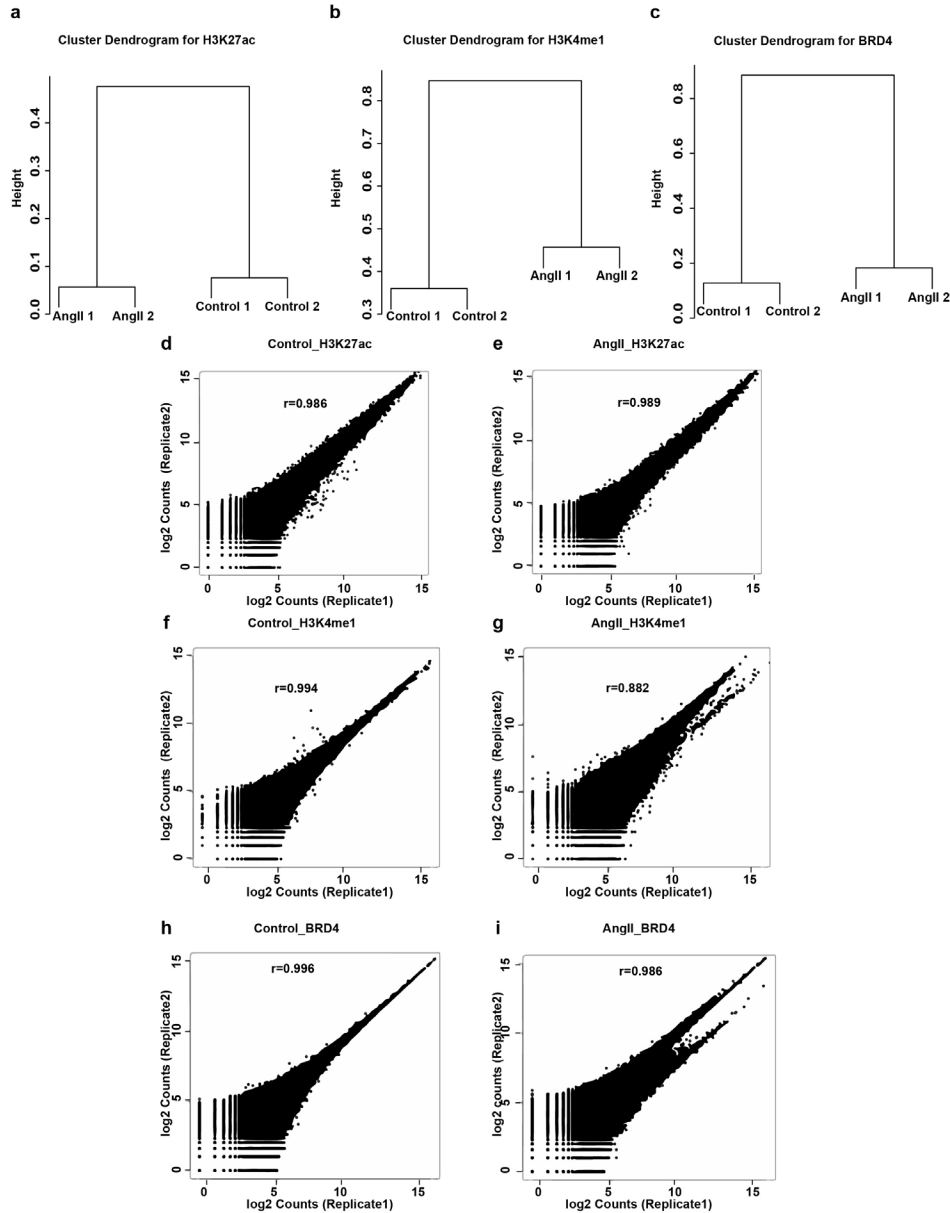

**Supplementary Figure 1. Correlation between ChIP-seq replicates.** (a) Cluster analysis of H3K27ac. (b) H3K4me1. (c) BRD4 ChIP-seq. Rat genome was divided into 566848 non-overlapping 5-kb windows. For each sample including both ChIP and input samples, coverage was calculated on each window and scaled to total number of reads across all the samples.  $\text{Log}_2(\text{ChIP}/\text{input})$  was then calculated for each window. The windows with enrichment levels ( $\text{log}_2(\text{ChIP}/\text{Input}) < 2$  in more than 2 samples) were excluded. The dissimilarities, defined as  $1 - \text{cor}$ , from the resulting data were finally calculated across the 4 samples (2 AngII and 2 controls) which were subjected to cluster analyses and shown as dendrograms. (d-i) Scatterplots of read counts ( $\text{log}_2$  counts) on identified peak regions for each replicate of H3K27ac, H3K4me1 and BRD4 ChIP-seq data for Control and AngII samples as indicated. Data shows very good correlation between the replicates (Pearson correlation coefficient ( $r$ )=0.882-0.996).

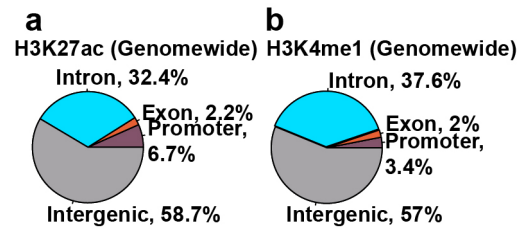

**Supplementary Figure 2. Genomic distribution of enhancer marks in VSMC.** Venn diagrams depicting (a) Distribution of H3K27ac and (b) H3K4me1 in the indicated genomic regions.

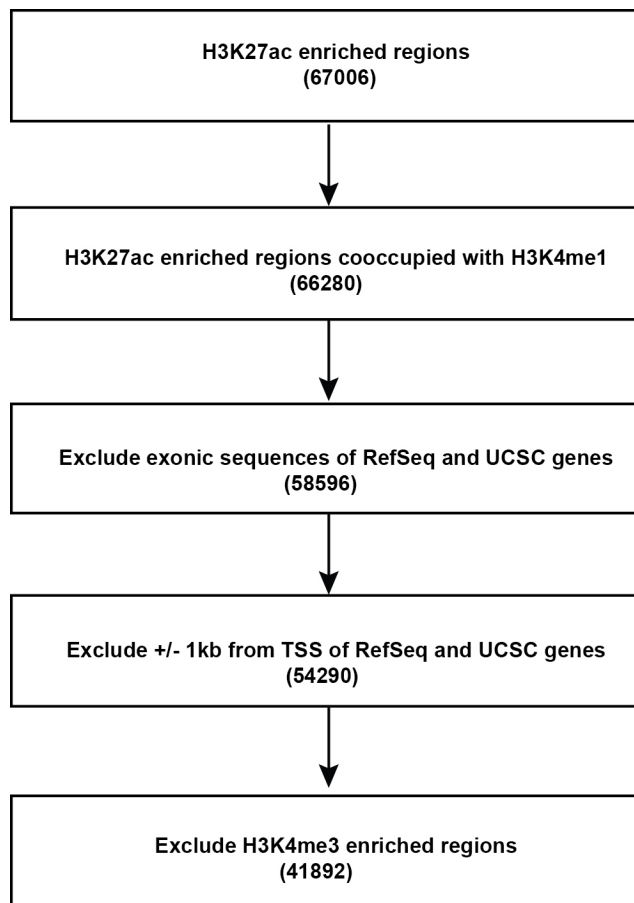

**Supplementary Figure 3. Strategy for enhancer identification.** Briefly, H3K27ac enriched regions were identified and filtered based on co-occupancy of H3K4me1. H3K27ac and H3K4me1 co-occupied regions were used to filter out exonic and promoter sequences of RefSeq and UCSC genes followed by removal of H3K4me3 enriched regions.

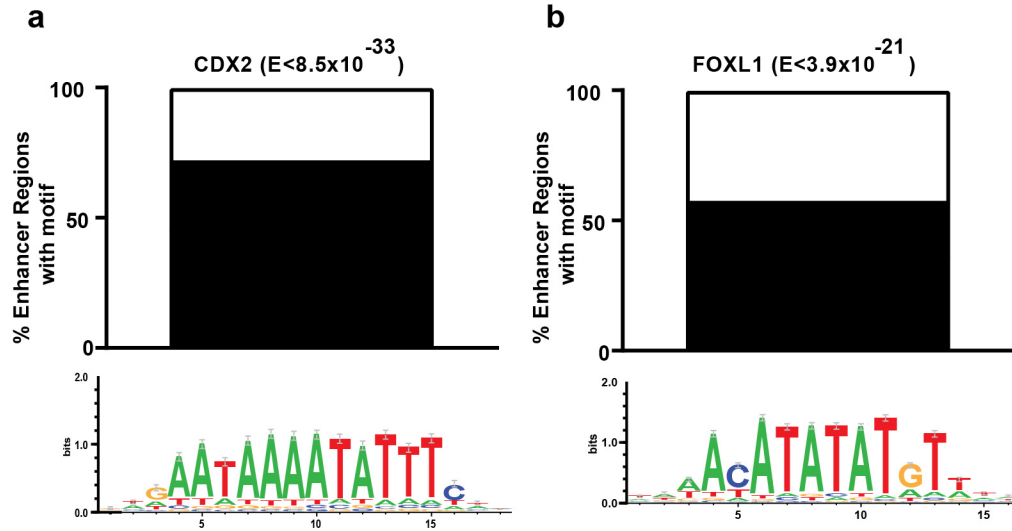

**Supplementary Figure 4. Motif discovery from AngII-downregulated enhancers. (a-b)** Enrichment of CDX2 and FOXL1 motifs in AngII-downregulated enhancers.

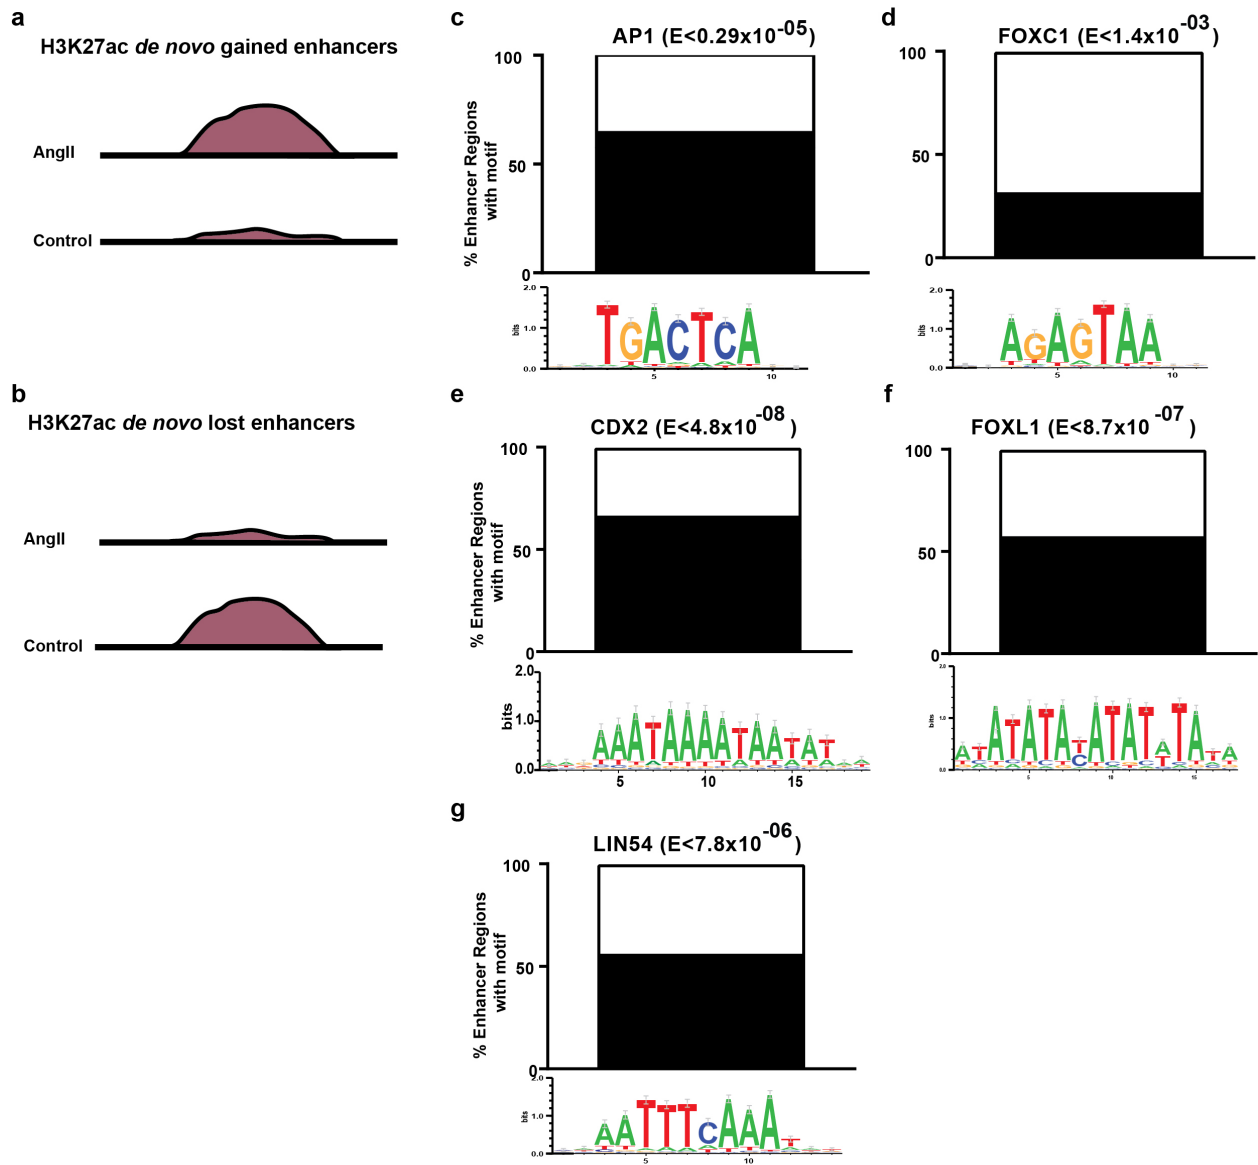

**Supplementary Figure 5. Enrichment of TF motifs on *de novo* gained and lost enhancers.**

**(a)** Schematic represents formation of *de novo* H3K27ac gained enhancers by AngII. **(b)** Schematic represents loss of H3K27ac enhancers by AngII. **(c-d)** Representative motifs of AP1 and FOXC1 are statistically enriched in H3K27ac-gained enhancers (where AngII treated H3K27ac ChIP enrichment signals are more than  $\log_2(1.5)$  and Control H3K27ac ChIP enrichment signals are less than  $\log_2(1.1)$ ) and shown as % of enhancers with individual motif. **(e-g)** Representative motifs of CDX2, FOXL1 and LIN54 enriched in H3K27ac lost enhancers (where AngII treated H3K27ac ChIP enrichment signals are less than  $\log_2(1.1)$  and Control H3K27ac ChIP enrichment signals are more than  $\log_2(1.5)$ ) and shown as % of enhancers with individual motif. E is Bonferroni adjusted *P* value.

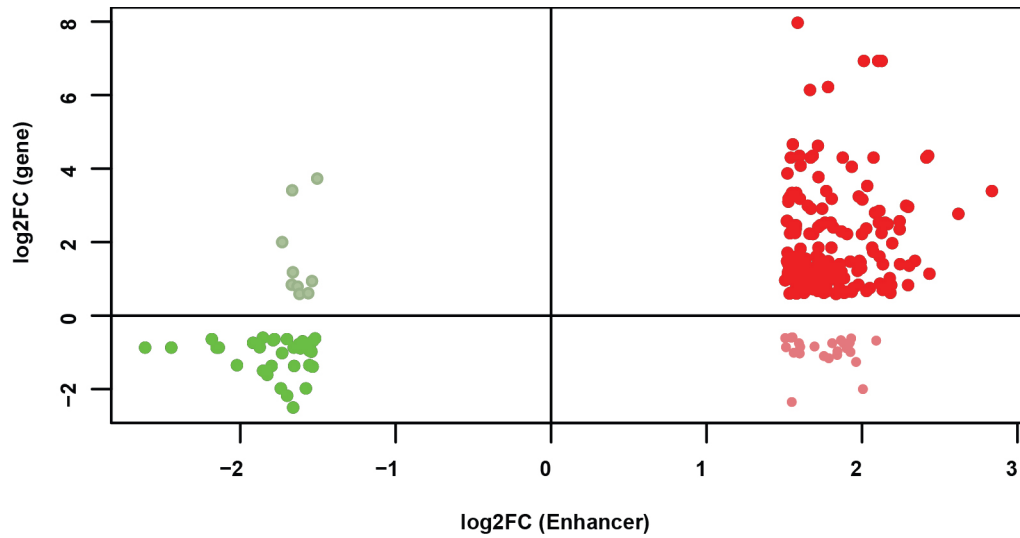

**Supplementary Figure 6. Correlation between differentially enriched enhancers and differentially regulated genes.** Scatter plot showing the log<sub>2</sub> fold change in expression of genes associated with differentially enriched H3K27ac enhancers ( $-1.5 > \log_2FC > 1.5$ ). Genes associated with upregulated enhancers are colored in shades of red and those associated with downregulated enhancers are colored in shades of green.

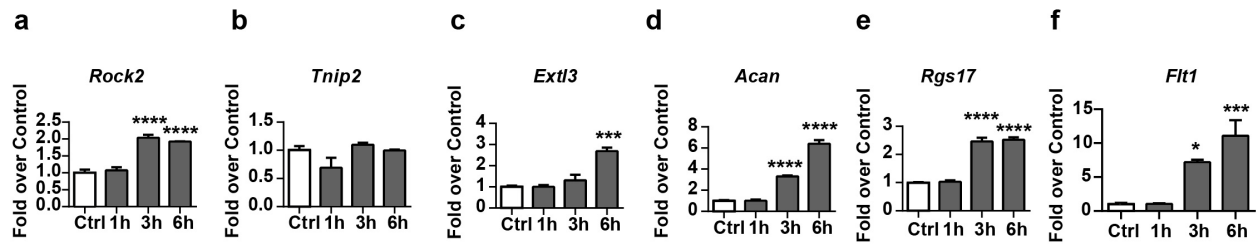

**Supplementary Figure 7. Enhancer-associated neighboring gene expression. (a-f)**

Expression of the indicated genes were validated in RVSMCs treated  $\pm$ AngII for 1-6 hrs *in vitro*. Mean $\pm$ SEM; \* $P$ <0.05; \*\*\* $P$ <0.001; \*\*\*\* $P$ <0.0001; vs. Ctrl;  $n$ =3, using one-way ANOVA, Dunnett's multiple comparisons test.

**a Upregulated enhancers**

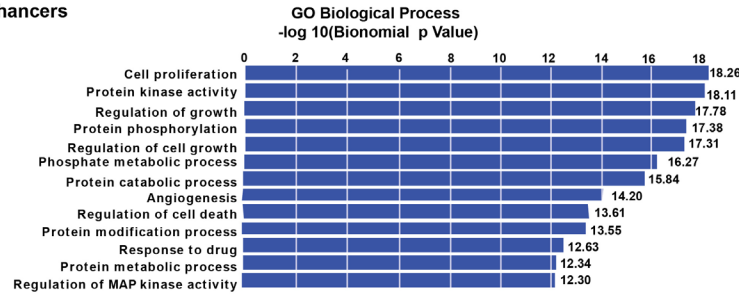

**b Upregulated enhancers**

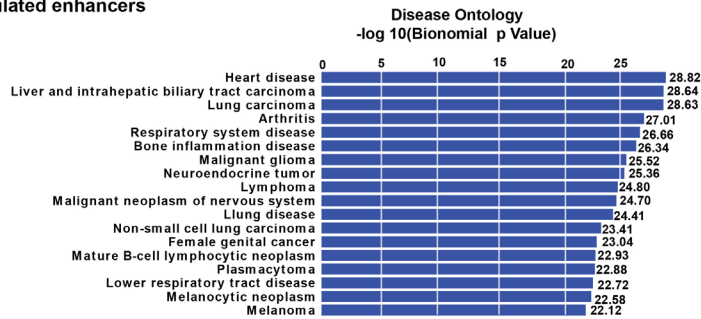

**c Downregulated enhancers**

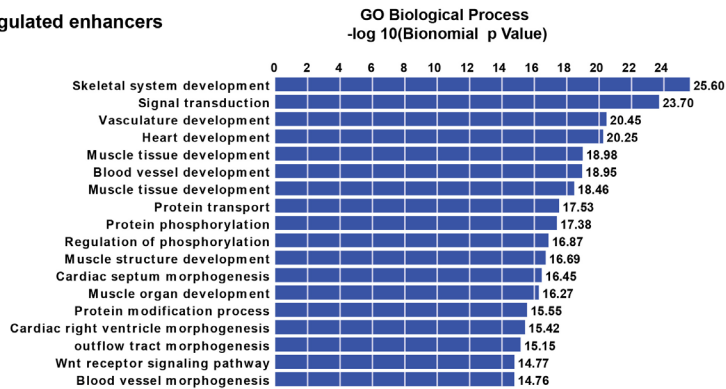

**d Downregulated enhancers**

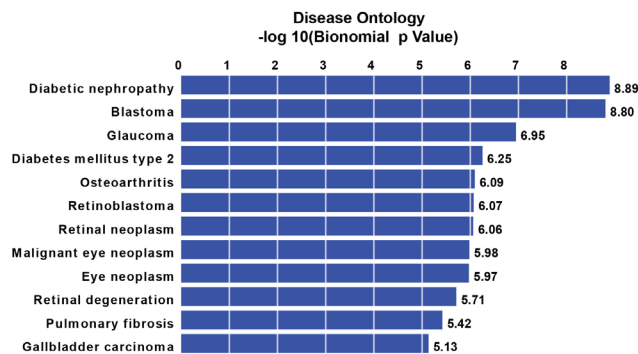

**Supplementary Figure 8. Functional annotation of differentially regulated enhancers. (a-d)** Identification of GO biological processes and Disease Ontology using GREAT tool. Upregulated enhancers are shown in panels (a) and (b), whereas downregulated enhancers are shown in panels (c) and (d). Values represent  $-\log_{10}(\text{Binomial } P \text{ value})$ .



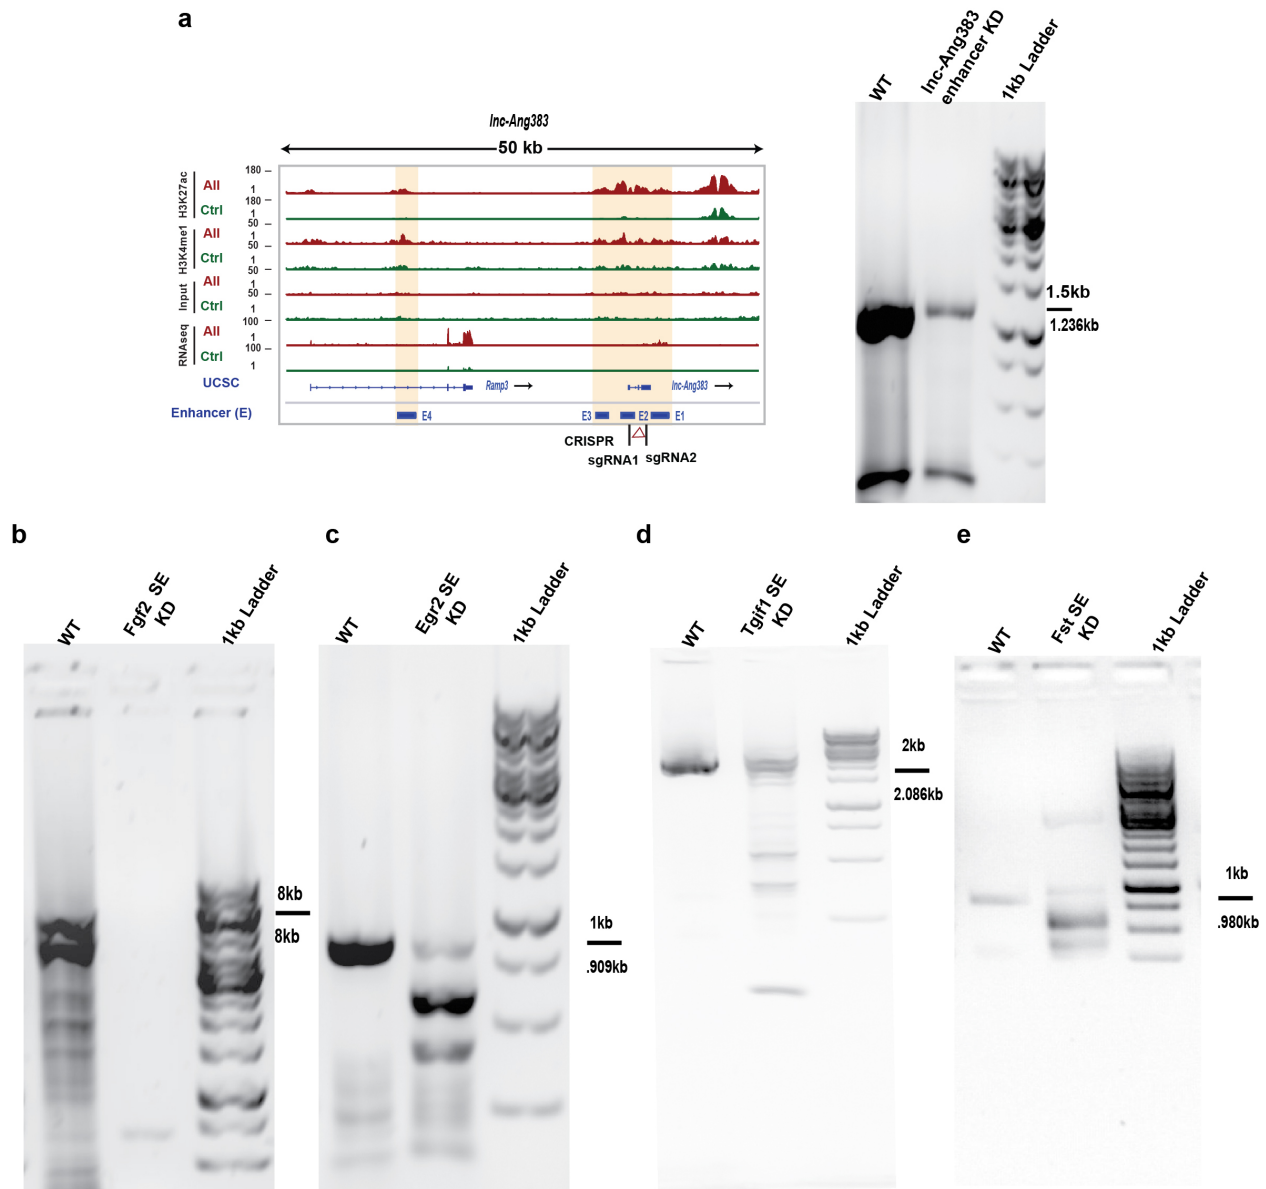

**Supplementary Figure 9. CRISPR-Cas9 mediated deletion of candidate enhancers/SEs. (a)** Genome browser tracks showing the relative position of the indicated enhancers (highlighted in orange) with respect to nearby indicated gene and the position of the sgRNAs (denoted by black lines) designed to delete the enhancer overlapping with lncRNA, *Inc-Ang383* using CRISPR-Cas9 editing in RVSMCs, and genotyping PCR result of *Inc-Ang383* enhancer deletion. **(b-e)** Genotyping PCR results to confirm deletion of SEs for *Fgf2* **(b)**, *Egr2* **(c)**, *Tgif1* **(d)**, and *Fst* **(e)**. The expected band size for each PCR is indicated on the right side of each figure.

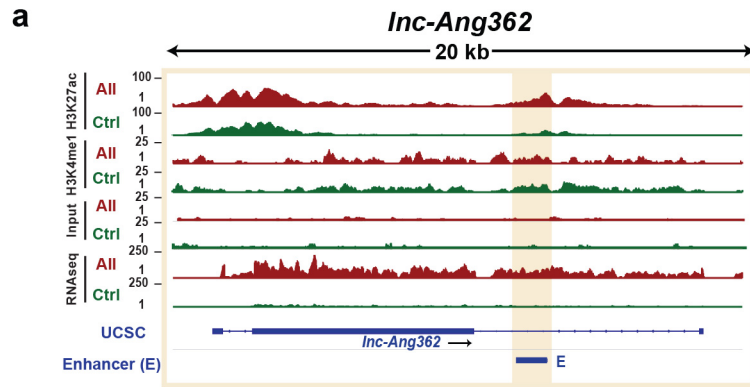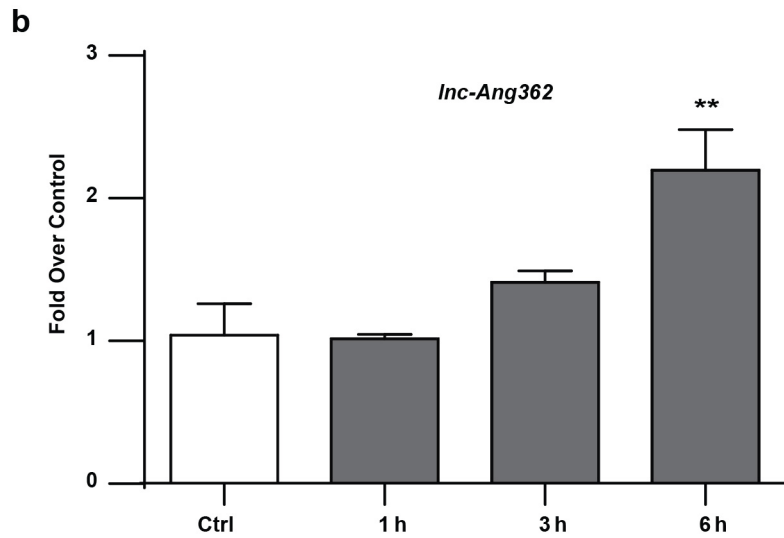

**Supplementary Figure 10. Genomic organization of *Inc-Ang362* overlapping enhancer and its regulation by AngII.** (a) Tracks show profiles of H3K27ac and H3K4me1 signal on RVSMC specific enhancer associated with *Inc-Ang362*. Each data track shown is on the same scale for both Control (Ctrl) and AngII. (b) Bars represent fold change in expression of *Inc-Ang362* upon treatment of RVSMCs with AngII for the indicated times. Mean+SEM; \*\* $P < 0.01$ ; vs. Ctrl;  $n = 3$ , using one-way ANOVA, Dunnett's multiple comparisons test.

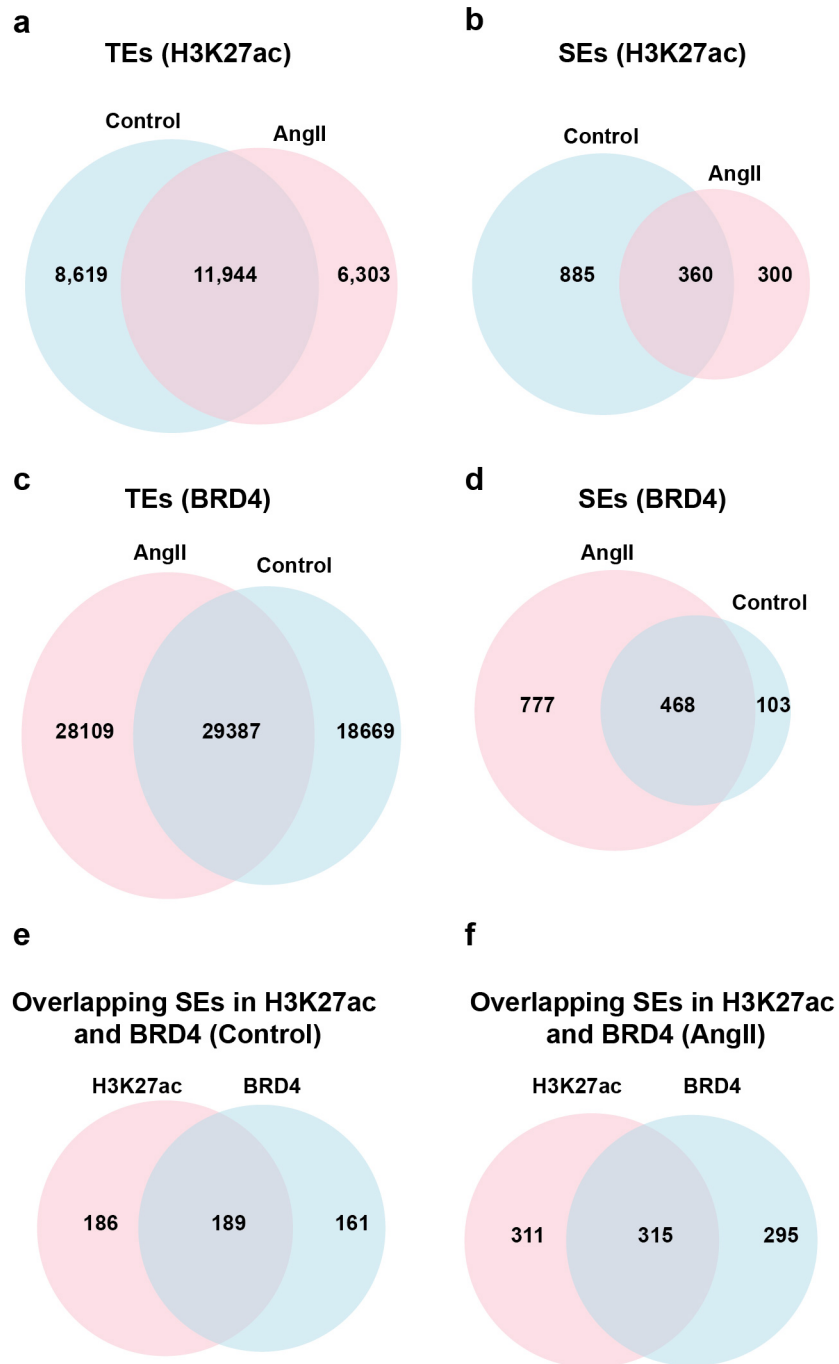

**Supplementary Figure 11. Comparison of H3K27ac and BRD4 specific TEs and SEs.** (a) Venn diagram showing the overlap between H3K27ac TEs and (b) SEs identified in Control and AngII conditions. (c) Overlap between BRD4 TEs and (d) SEs identified in Control and AngII conditions. (e) Overlap between H3K27ac and BRD4 SEs identified in Control (untreated) and (f) AngII treated RVSMCs.

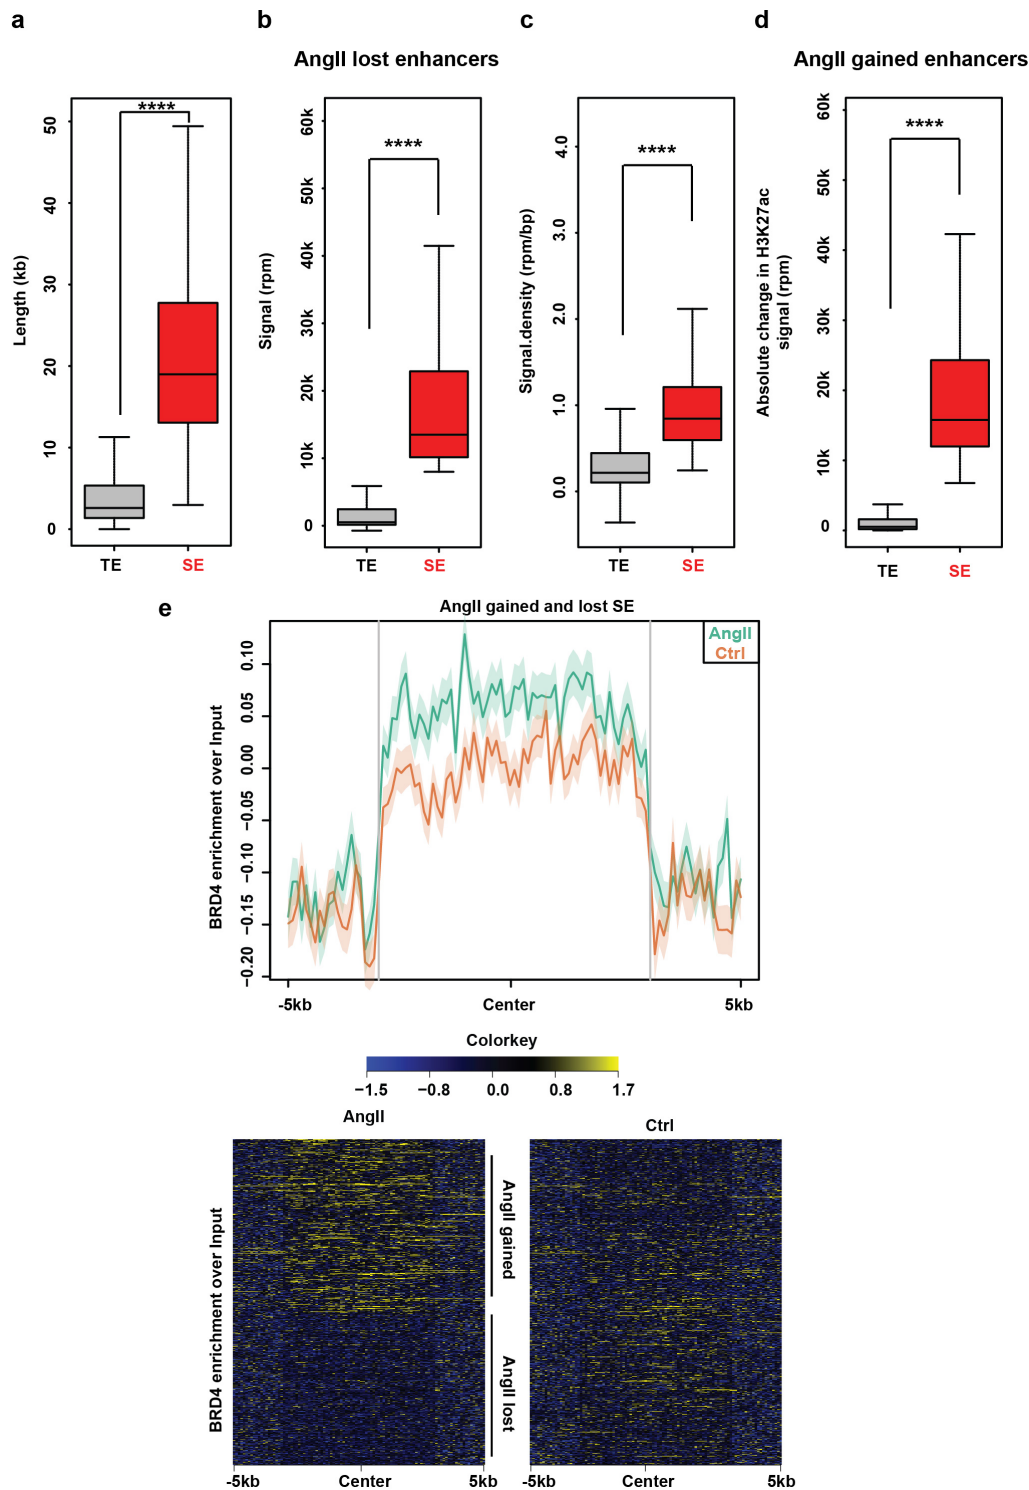

**Supplementary Figure 12. Characterization of AngII gained and lost SEs.** (a) Boxplots show median enhancer length (kb), (b) signal (rpm), and (c) density (rpm/bp) in AngII-lost TEs and SEs. (d) Boxplot shows the absolute change in H3K27ac signal in response to AngII treatment measured at AngII gained TEs and SEs. For (a-d), \*\*\*\* $p < 0.0001$  using unpaired two-tailed t test. (e) Average profile and heatmaps of BRD4 enrichment over SEs gained and lost upon AngII treatment.

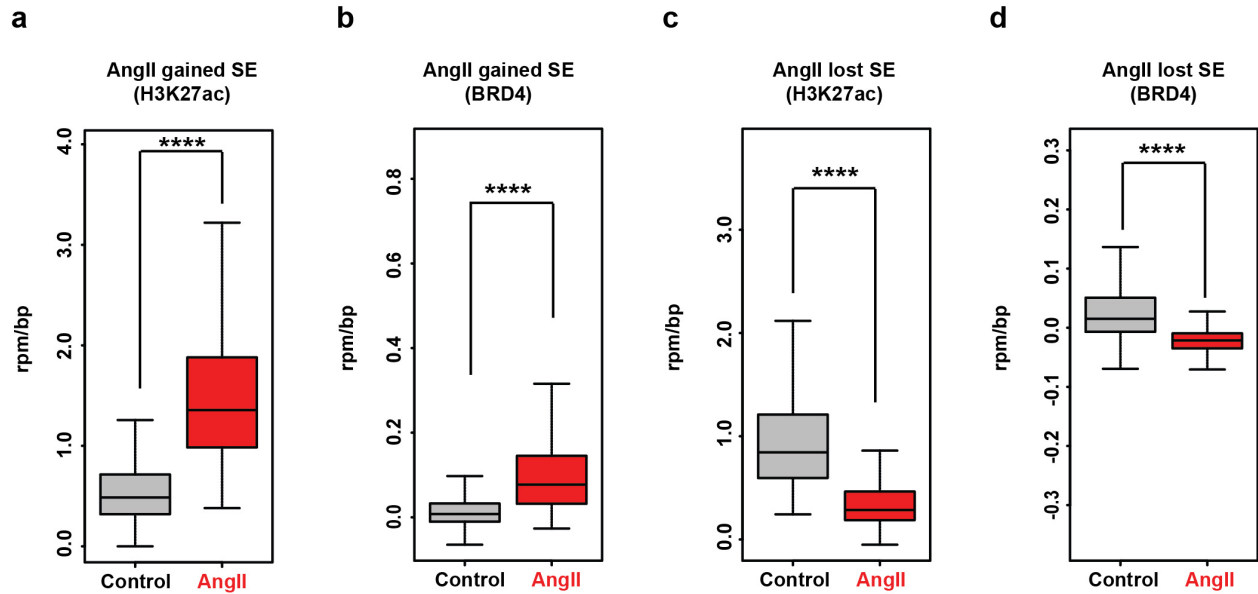

**Supplementary Figure 13. AngII-induces co-ordinate changes in H3K27ac and BRD4 occupancy over SEs. (a)** Boxplot of H3K27ac and **(b)** BRD4 signal density (rpm/bp) at AngII gained SEs. **(c)** Boxplot of H3K27ac and **(d)** BRD4 signal density (rpm/bp) at AngII lost SEs. \*\*\*\* $P < 0.0001$ , using unpaired-two tailed t test.

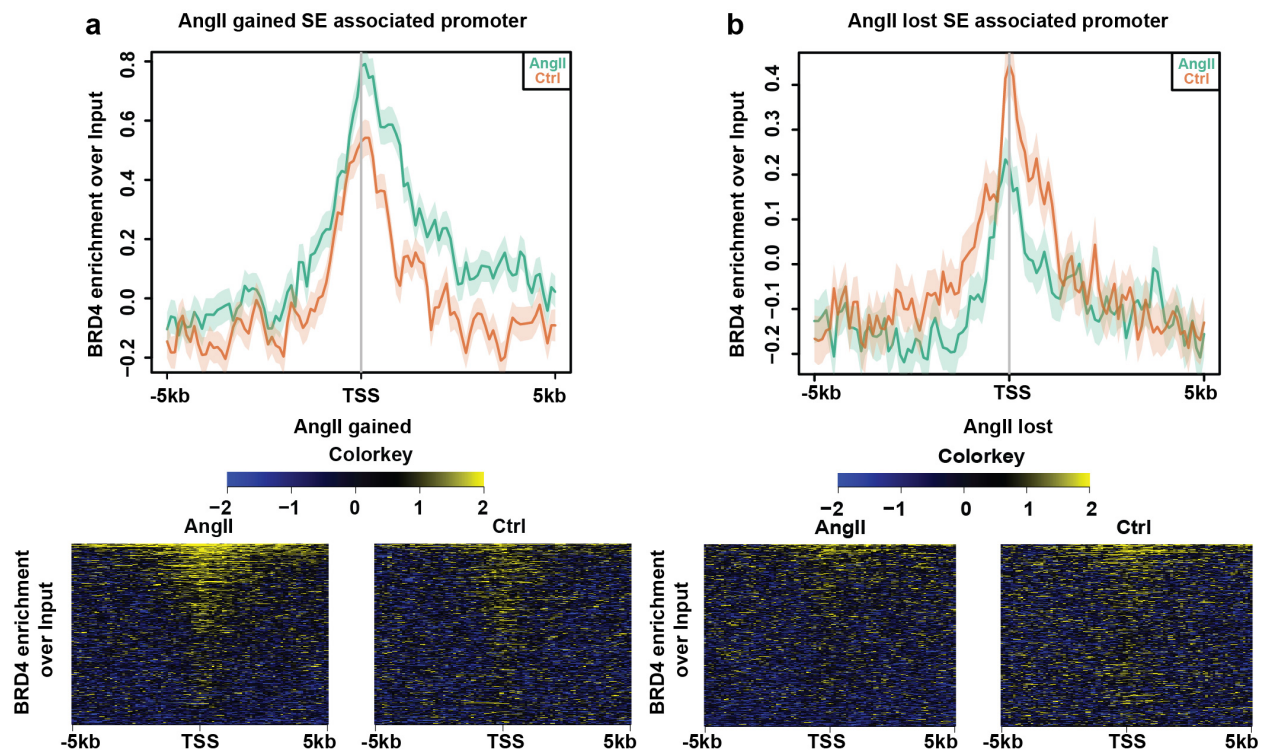

**Supplementary Figure 14. BRD4 enrichment mirrors H3K27ac enrichment on SE regions. (a) Average profile and heatmaps of BRD4 enrichment over promoters of AngII gained and (b) AngII lost SE-associated genes.**

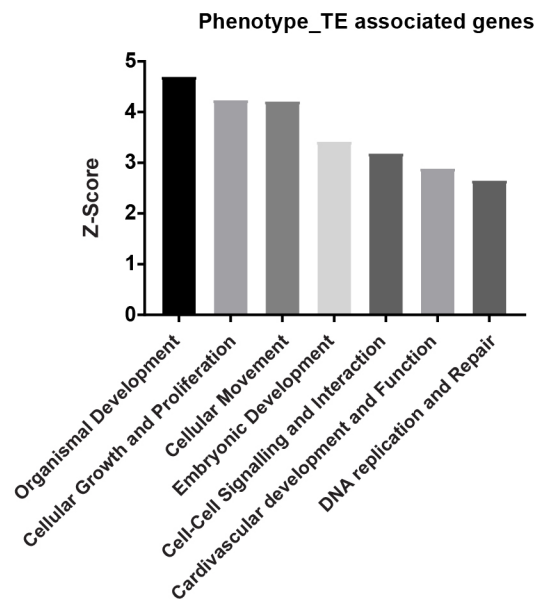

**Supplementary Figure 15. Phenotypes associated with TEs.** IPA Pathway analysis of genes associated with TEs.

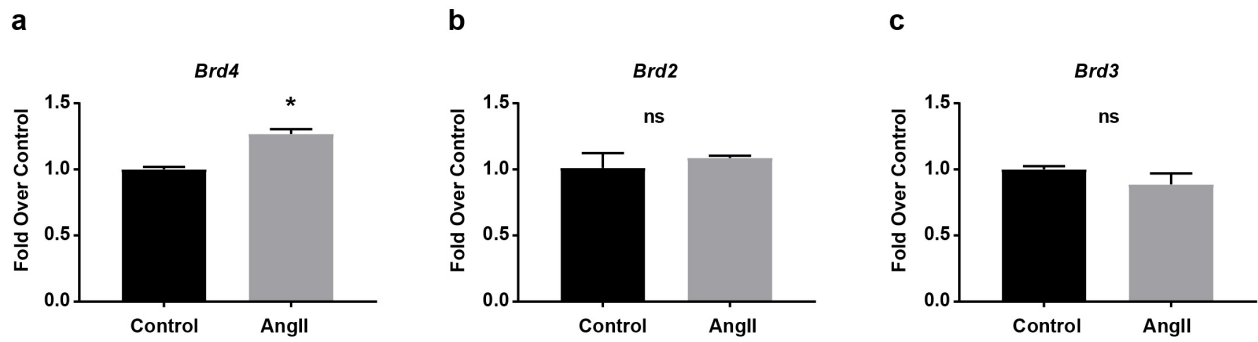

**Supplementary Figure 16. Expression of BET family proteins in VSMCs.** (a-c) *Brd4*, *Brd2* and *Brd3* expression were quantified by RT-qPCRs in RVSMCs treated  $\pm$ AngII for 3 hrs *in vitro*. Mean+SEM; \* $P$ <0.05; vs. Control;  $n$ =3, using unpaired-two tailed t test.



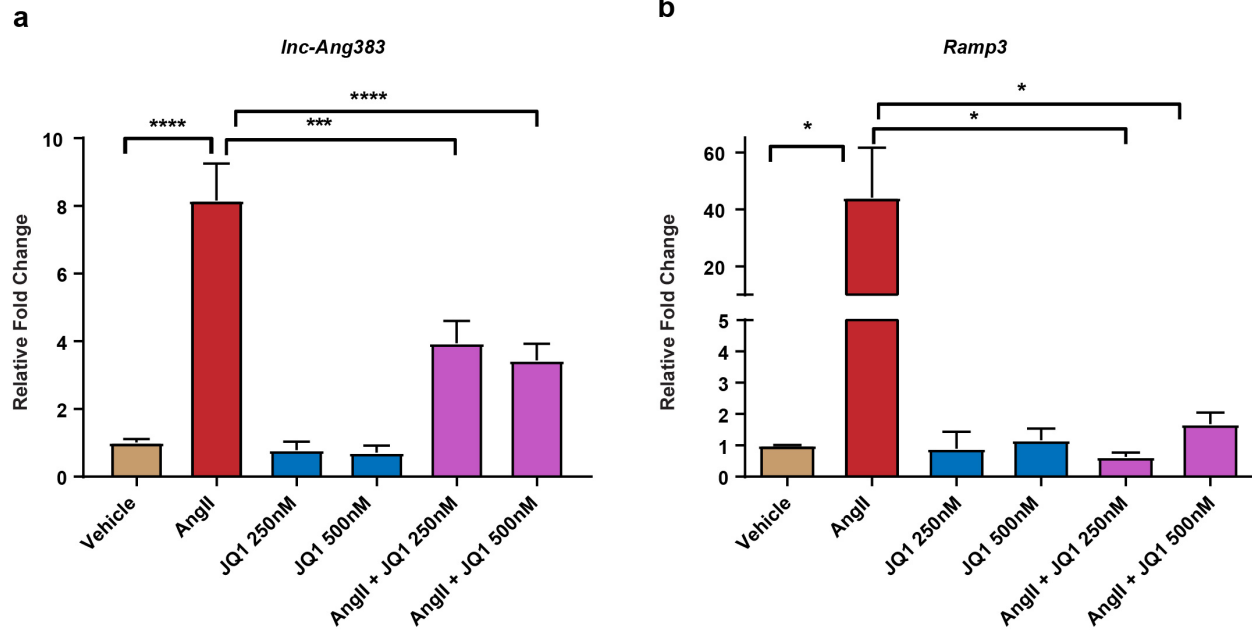

**Supplementary Figure 17. JQ1 attenuates AngII-induced expression of *IncAng383* and *Ramp3*.** (a-b) Bars represent the expression of SE-associated genes measured by RT-qPCR in RVSMCs pre-treated with vehicle (DMSO) or the BRD4 inhibitor JQ1 (250 and 500 nM) and then treated *in vitro* with AngII as indicated. Gene expression was normalized with *Ppia* and represented as relative fold change with respect to Vehicle. Mean+SEM; \* $P < 0.05$ ; \*\*\* $P < 0.001$ ; \*\*\*\* $P < 0.0001$ ;  $n = 3$ , using one-way ANOVA, Tukey's multiple comparisons test.

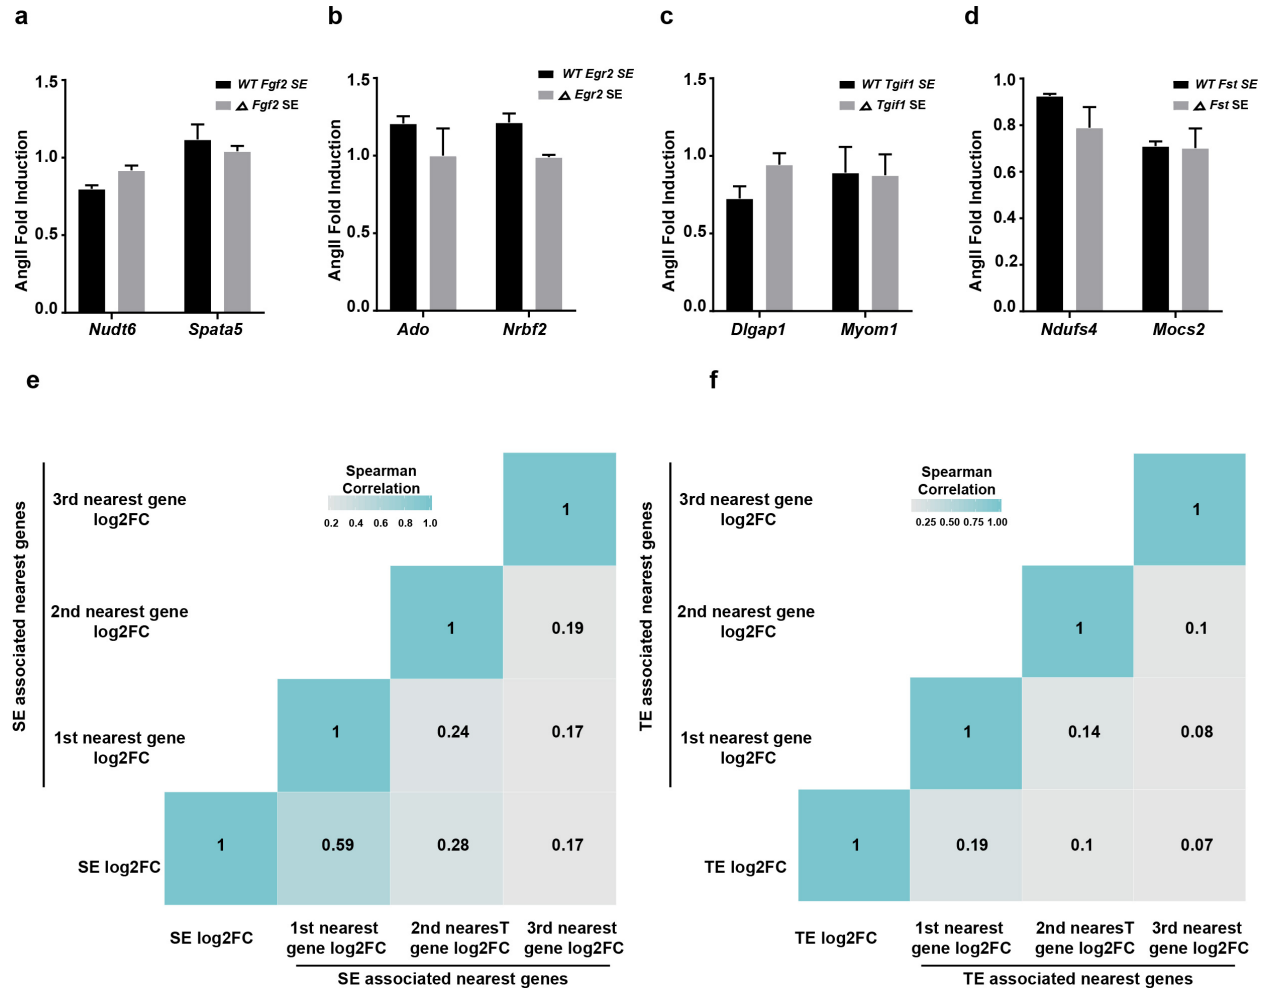

**Supplementary Figure 18. SEs regulate the first nearest AngII-regulated genes. (a-d)** Bar graphs show the AngII-induced expression of indicated genes in WT and SE deleted ( $\Delta$ SE) RVSMCs. Gene expression was normalized to *Ppia* and expressed as AngII response vs. respective Controls. Mean  $\pm$ SEM,  $n=3$ . Data is not significant, using unpaired two-tailed t tests. **(e)** Correlation heatmaps representing Spearman correlation co-efficients between log2 fold change in H3K27ac occupancy at SEs and **(f)** TEs and the expression changes of 1<sup>st</sup>, 2<sup>nd</sup> and 3<sup>rd</sup> nearest gene mapped within  $\pm$  500 kb from the enhancer centre. For **(e-f)**, all differentially regulated enhancers (SEs/TEs) that had 1<sup>st</sup>, 2<sup>nd</sup> and 3<sup>rd</sup> nearest genes mapped within  $\pm$  500 kb from the enhancer centre were considered regardless of whether the nearest genes were AngII-regulated or not.

---

**qRT-PCR expression****Refers to Figure 1 G-J**

---

| <b>Gene</b> | <b>Forward Primer (5'-3')</b> | <b>Reverse Primer (5'-3')</b> |
|-------------|-------------------------------|-------------------------------|
| <i>Jun</i>  | agggttaagacaccgcttg           | ggagaacctctgtcgctg            |
| <i>fos</i>  | ctccgtttctctctcttcag          | tccttacggactccccac            |
| <i>Ets1</i> | ctctcaactggcaggaagatg         | gctcgtcaggtaggattcag          |
| <i>Ets2</i> | acggatgggaattcaagctc          | tgcccgatgtcttgtaagt           |
| <i>Ppia</i> | ccgctgtctctttcgcc             | gctgtctttggaactttgtctg        |

---

**Refers to Figure 2**

---

| <b>Gene</b>      | <b>Forward Primer (5'-3')</b> | <b>Reverse Primer (5'-3')</b> |
|------------------|-------------------------------|-------------------------------|
| <i>Esm1</i>      | cttcccttcttccagtatgc          | gttccggtctccaatctcttc         |
| <i>Spry2</i>     | atcagatcttggcgggtgtg          | tgtgtaccttgctgttgag           |
| <i>Agtr1a</i>    | ggcagtcattctggattctttg        | acacaacctcccagaaaag           |
| <i>mEsm1</i> *   | ggaagatgtctggactttccc         | cgttcccttctccaatctcttc        |
| <i>mSpry2</i> *  | atcaggctcttggcagtggtg         | agaggattcaaggagagagg          |
| <i>mAgtr1a</i> * | gctggcattttgtctggataac        | gcttttctgggttgagttgg          |
| <i>mPpia</i> *   | atggtcaaccccaccgtg            | ttcttgctgtctttggaactttgtc     |

---

**Refers to Figure 3**

---

| <b>Gene</b>     | <b>Forward Primer (5'-3')</b> | <b>Reverse Primer (5'-3')</b> |
|-----------------|-------------------------------|-------------------------------|
| <i>Fgf7</i>     | tgaatactatcttgcctgaacaaag     | acgaacatttcccctccg            |
| <i>Slc29a2</i>  | tggtgaagggtgatttgagc          | tgaggaagagggtgctgtag          |
| <i>Serpine1</i> | cacaagcactacaaaaggtaag        | gccgaaccacaaagagaaaag         |
| <i>CD44</i>     | cttcagctctccagtaagt           | ctccagtcattagacaaccttc        |
| <i>Egr3</i>     | attacactcagatggctacagc        | ctggaaagagcccgaataagag        |

---

|              |                       |                          |
|--------------|-----------------------|--------------------------|
| <i>Vcl</i>   | aggagaaacagaaaagagggc | ctgtaactcctaacctttcacatg |
| <i>Clu</i>   | tcttgcaactctcacactg   | agctttacagttcccggatg     |
| <i>Foxp1</i> | gttttgtgcgagtagagaacg | cattgagaggtgtgcagtagg    |

---

**Refers to Supplementary Figure 7**

| <b>Gene</b>  | <b>Forward Primer (5'-3')</b> | <b>Reverse Primer (5'-3')</b> |
|--------------|-------------------------------|-------------------------------|
| <i>Rock2</i> | cacaagaccacaaaagcagc          | gagtaggttctccactttctgc        |
| <i>Tnip</i>  | ctgatgagaccaccaactg           | ggatccctgcttgtatgctc          |
| <i>Extl3</i> | accccacaatgcatcac             | ctgcccctggaatgagatagag        |
| <i>Acan</i>  | aaccttgcctccaatgactc          | ctcggtaaaagtccagtggtg         |
| <i>Rgs17</i> | Cccacacaccacaaaatg            | gagaccaggacaagacttcac         |
| <i>Flt1</i>  | cctcagcctaccatcaagtg          | gccctcgattctgtttcctatg        |

---

**ChIP Primers**

**Refers to Figure 3**

| <b>Enhancer proximal to</b> | <b>Forward Primer (5'-3')</b> | <b>Reverse Primer (5'-3')</b> |
|-----------------------------|-------------------------------|-------------------------------|
| Neg Ctrl                    | agcttaaagtgtctccagca          | atatcaggtcctttgtgaagt         |
| Spry2                       | actttctgacagagctggatt         | tgaggtgtctcctggaatc           |
| FGF7                        | tccttctccattgggtgatt          | ggtacagagacagcagataga         |
| Slc29a2                     | ggtcctcgacaagaacagaatag       | taggaggaggaaggctcaaa          |
| Serpine1                    | cttactggaagcgaggtgtag         | gagacagcacttagaggaatgg        |
| Sgk                         | ccagactacctgcctattaatctc      | cctgagctgagtgatgtaagg         |
| CD44                        | gcagggatgacacatcagaa          | gttggctgtggtgtctcttta         |
| Ezr                         | cctagtcaggttctgtctgtct        | tgttctgtgtccctgtcttac         |
| Esm1A                       | acatacaggcactcacagaac         | gcatggcaactcagaatcac          |
| Esm1B                       | agcaccaggaaccaactattc         | ctcttgagagttcccttctaac        |
| Esm1C                       | gaaccagaacatcaggaagtc         | cagcgtctggcaagtagtaac         |

|          |                         |                          |
|----------|-------------------------|--------------------------|
| Egr3     | ctgtgtatctggcatacgatctg | ctccgtgtgtgagtatgtgtatag |
| Cebpγ    | ctgaagtggaaggactgaactg  | gtgggtgggcagaatgagaaa    |
| Jun      | tggatggatggcacagttac    | agagagagagagagagagagaga  |
| Foxp en1 | tgtctcttcagggaacataac   | aagctgttgggttccttctatc   |
| Foxp en2 | ctccttaccttccctttctgttt | ggcccttggctcactgftatg    |
| Ets2     | cagtgagttctgcctactctg   | caagggtggagacagggttatg   |
| Agtr1aUA | cgactgggtgccttgtatct    | ctagggaccagactgaataaac   |
| Agtr1aUB | caggtgccactggatacaaa    | accctcacctagatcagtaagt   |
| Agtr1aDA | ctgacagactactctgcaatcc  | ctgccttgggatctctcataaa   |
| Agtr1aDB | caagtgccatacctactactg   | ggctaaccctcgtcttctatg    |
| Ago2     | tggcaggtccttattgtctatc  | gggtctcctagagatggacttac  |
| Vcl      | aacaggcaggagcaaaaca     | gtacgtgtaggttccgtgtag    |
| Clu      | cttagctccattccctgacaaa  | tctccttccagccctaaa       |
| mEsm1A*  | ttgccaccttgaggactattg   | gcctgccttctctgtaaat      |
| mEsm1B*  | cccgtgggtgaatgagatatt   | agcgtagggtgagacaaatg     |

---

### Luciferase Constructs

Refers to Figure 4

| Construct | gBLOCK sequence (5'-3')                                                                                                                                                                                                                                                                                                                                                                                                                                                                                                                                                                                                                |
|-----------|----------------------------------------------------------------------------------------------------------------------------------------------------------------------------------------------------------------------------------------------------------------------------------------------------------------------------------------------------------------------------------------------------------------------------------------------------------------------------------------------------------------------------------------------------------------------------------------------------------------------------------------|
| Ccl2-Prom | ggaggcctaactggccgtacctagatctgctagcctcaggatatacagcggccgctggcaaaatgtctgggagtcaccaaagc<br>agagaatgccatattcaacaagcctgataaccaaggactcagtggactaattggcagtcctatccagatccaaggctccttgagc<br>caggggcaagctaggatgctcccaggatcttctcccttaggactttaggttcttggccacttctcttatttcagtgaaagcagatc<br>cactcattgacacttgtggtcacagtctagcacgactgctcccttctcttttctcctcctgcgcagcttcattgctcccagtagtg<br>gctggaaaaacaccaaattccaatccgcgggttctccttctacttctggaacatccaaggctcggcacttactcagcagattca<br>aacttccacttccatcactcatcgaggatgatgctgctccttggcaccaccacctgcctgactccacccttggcttacaataaaa<br>ggctgaggcagagccgctagaaatgcagagacacagacagaggccagccagaaaccagccaactctcactgaaaagctccc |
| Spry2-enh | ggaggcctaactggccctgaagttagggctcagtcctgctccaggtctgaactgtcttcccttggcagccttcttggcacacattaaa<br>atgacagccacattccctcactactccctcagcgcctctgtagcagggaggtctgcttaattaggcttacaggcagactgactg<br>ggtaattcttgatcttgagagaagtactttgtattgtaggctgttggtatcaccctggccttcccttctctattgccagcagtgaagtc<br>caaaaaatctaaaggccttgcctaatggaccttgaggcaggggactagacaccaagaccttaagtagataatgttatcagcttc                                                                                                                                                                                                                                                                  |

ttccaagacttagcacetaagtctcagattatcagcttgaaagctcgaggaccatTTTTctctctctcatctgtggcatcacaattta  
caacaataaggtgcacggtaagagtttagtcagtgacgagtagttgcaccctggcctgaaagcttgggttttagcagtactatgga  
tccaacctaggctctcccacatgctagggccaccgctctacctaggagctacagcagttctactgtctcagacagttctgtttcaca  
gcgtagggcaaaagtctcagaaggcctcctactgggctcatcgggtgacttcacagatgataagtaagaagtcagttctgacag  
agctgggtatttcagtgttgfttaaggtttactcagtagctaagagtgcaacaaagtgaaccaatcaggctttagcccaacttgc  
ggccagattccaggagacacctcagctaaagccaagtgtcgaggcatggctgtgtcatctctggagtcagtccttacctgcg  
gccgcaaaaggaaaa

Esm1A-enh ggaggcctaactggcccacctccactcgtcaagtctgaagtgtttgaattgtgggtgtaattctgtatgcataaagtttccgctctg  
tacaattattcagttatggaacacagagactttgacagtgttctccagtcactgccctcaaaggagtgcctagaagctcgggtttct  
tgttctctgttaacccagtcgaccactgacattagccatcatgagcatctgtgtatcgtaccagaaaggaatgtctcaagctcagg  
tgacagaaatgaatcacatacaggcactcacagaacaaaggaacagtattttctcaataataaagacaatccgggaggtcttgc  
atcttcagggcagtgattctgagttgccatgccaggcctctagatgtcctttgttgaatctgtgtgaaactcccagactttgcaac  
tcttgcgtccttttgtgcttatttagatttctattgccatgataaaatacctgacaaaaagcatctaaaggcgaggagaggggttattc  
acctcatagctttagctcctgaagggaagtgcagcaggaattgggtggaacctggaggaggcacctgggagcagggactgaag  
cagaggccatagaggaggaactgcataatgactgcttctctggctcgtcagctggcttttctacaacgcaggaagccctgc  
ccaggagtgccactgccaggagtgccactgccccagtgactgggctctctctatcaattagcaatcaaatgccccaggctt  
gcctatagacgagcctctaagtctgataatgcttttaaaaaatcaattcctgttcagatttaactctactgtgtcaaatcaacaaca  
caacagcagcagtagcagcagcagccaccacctaaccagaacaacatgatttaaaaccagcatcacatggaaaccaccagtc  
agttgctggcttgagtgaatctgggactcctgggaccaaaagacacattgacctccatgcttgacaactgaagatagggaaat  
atatcctggagagggcacttcatgaccagccagtgaaagtaagacacctagatcttagaggctagaggtgctctttctacaggta  
gcatctttcaaggagttactccatatccttgagcctacagtggagcggccgcaaaaggaaaa

| Enhancer  | Forward Primer (5'-3')               | Reverse Primer (5'-3')        |
|-----------|--------------------------------------|-------------------------------|
| Esm1B-enh | ggaggcctaactggcctaccctcctgaatctatg   | ctagctagccatagctcccctagtcc    |
| Esm1C-enh | ggaggcctaactggcctaaaatccaagtggctttag | ctagctagcagaggtagcatgaaaacc   |
| Egr3-enh  | ggaggcctaactggccttcttctgtccttgg      | ctagctagccatctagttcagcaaaagag |

**qRT-PCR expression Inc-Ang184 and**

**IncAng383 CRISPR Phenotype**

Refers to Figure 5

| Gene            | Forward Primer (5'-3') | Reverse Primer (5'-3')     |
|-----------------|------------------------|----------------------------|
| <i>Ccl2</i>     | gcagctcagcagaggtagtgg  | cggtatagggtctgagaagattaccg |
| <i>Serpine1</i> | gcagctctctgtagcacaagcc | cggcctctgttgattgtgccg      |

|                   |                          |                            |
|-------------------|--------------------------|----------------------------|
| <i>IL6</i>        | ggataccaccacacaacagaccag | cgatgagttttctgacagtgcacatc |
| <i>lnc-Ang383</i> | atgtccacactgtatgctc      | ctgctccacttctctcactatg     |
| <i>lnc-Ang184</i> | cagacctagtggcagtttc      | cgctataacctcaacacttcc      |
| <i>Ramp3</i>      | gcacctctccctctgttg       | tccagattcctgtctcattg       |

---

**Dicer-substrate short-interfering RNAs (DsiRNAs)**

**Refers to Figure 5H**

| <b>Name</b>    | <b>Sense (5'-3')</b>        | <b>Anti-sense (5'-3')</b> |
|----------------|-----------------------------|---------------------------|
| Dsi-lnc-Ang383 | gaacuaauagcuaaggcuuuccaaguu | cuuggaaagccuuagcuauuagutc |

---

**Refers to Supplementary Figure 10**

| <b>Gene</b>       | <b>Forward Primer (5'-3')</b> | <b>Reverse Primer (5'-3')</b> |
|-------------------|-------------------------------|-------------------------------|
| <i>lnc-Ang362</i> | gtcccattctgttcctttg           | cacactcaccttctattccc          |

---

**CRISPR-sgRNAs**

**Refers to Figure 5 (I-M) and 9 (A-D)**

| <b>Enhancer sgRNA<sup>#</sup></b> | <b>Forward Primer (5'-3')</b> | <b>Reverse Primer (5'-3')</b> |
|-----------------------------------|-------------------------------|-------------------------------|
| lnc-Ang383SG                      | caccgactgtttattcgttctctac     | aaccgtagagaacgaataaacagtc     |
| lnc-Ang383ASG                     | caccgcttgattccagcaccgaag      | aacccttcggtgctggaatcaaagc     |
| Egr2SG                            | caccgccccttcccggcggtct        | aaccagacacgccgggaagggcgc      |
| Egr2ASG                           | caccggagcgcacggtatgcgggc      | aaccgcccgcacccgatgcgctcc      |
| Fgf2SG                            | caccgcggtctactgcaagaacgg      | aaccccgctcttgtagtagaccgc      |
| Fgf2ASG                           | caccgtctgggtccataaggctacc     | aaccggtagccttatggaccagac      |
| FstSG                             | caccgagactgcacttccaageta      | aacctagcttgagagtgcagtcgc      |
| FstASG                            | caccgatgcgccagaggttcggct      | aaccagccgaacctctgggcgcatc     |

|          |                           |                           |
|----------|---------------------------|---------------------------|
| Tgif1SG  | caccgatgetttaatcccatcactc | aaccgagtgatgggattaaagcatc |
| Tgif1ASG | caccgttcataatacccgaactgta | aacctacagtcgggtattatggaac |

---

### CRISPR Genotyping

Refers to Supplementary Figure 9

| Gene              | Forward Primer (5'-3') | Reverse Primer (5'-3')  |
|-------------------|------------------------|-------------------------|
| <i>Fst</i>        | ggagcatctgctaagcgtaaa  | ctccgacagataattgggaagg  |
| <i>Tgif1</i>      | gcattgatacatgccagcaaa  | gtgcatgctatgttcgcataat  |
| <i>lnc-Ang383</i> | tacagaagaagacagcacacac | agctaaggctttccaagttaatg |
| <i>Fgf2</i>       | agtccggctgcactagg      | ggagggataatgctggagtttg  |
| <i>Egr2</i>       | ggtagagagaatggagcagaag | gtagcgtgggtcaagaaaga    |

---

### qRT-PCR expression

Refers to Figure 8 A-N and Supplementary Figure 16 A-D and 18 A-D

SE associated Genes

| Gene         | Forward Primer (5'-3') | Reverse Primer (5'-3') |
|--------------|------------------------|------------------------|
| <i>Fst</i>   | gagtgaagagataggggaagc  | agcgagtgtgcatgaag      |
| <i>Egr2</i>  | gaaggctggtttctaggcg    | aatggtgaactgggagggc    |
| <i>Tgif1</i> | tgacgatgaaaggccaagg    | cgaaatgatttacacgagcagg |
| <i>Fgf2</i>  | accacacgtcaactacag     | ggcgtcaaagaagaacactc   |
| <i>Flt1</i>  | cctcagcctaccatcaagtg   | gccctcgattctgttctctatg |
| <i>Foxp1</i> | gttttgtgcgagtagagaacg  | cattgagaggtgtgcagtagg  |
| <i>Brd4</i>  | ttgatgcttgagttgtgtttgg | catgatagtccaggcaaaggg  |
| <i>Brd2</i>  | gaagcgggaactagagaagc   | gaactagaagcactgagacgg  |
| <i>Brd3</i>  | tcctctttcgatttgctgc    | cccagacgagattgagattgac |
| <i>Nudt6</i> | ggtgctaacaatcaatacggc  | ctctgggcttctgcttcc     |



|               |                        |                       |
|---------------|------------------------|-----------------------|
| <i>Spata5</i> | ccagtgctccttaccagttg   | cagcttcacacccacattc   |
| <i>Ado</i>    | gcctggacgatggattactg   | gcagtgacaaaaccaggaatc |
| <i>Nrbf2</i>  | gggtctatggaagtgatggaag | tcagttcatggcttcagag   |
| <i>Dlgap1</i> | gccacactttgaatgctacac  | agaccgaaggagaaaatgcc  |
| <i>Myom1</i>  | tgattacggctattcccatgg  | accatgtagttgcctgacag  |
| <i>Ndufs4</i> | gatcccaggcattcatcgtag  | aactacaggtacacttggcag |
| <i>Mocs2</i>  | tgccaagaagctctcagtg    | tgccatgggtagatatgcttc |

---

**ChIP**

**Refers to Figure 8 O-P**

---

| <i>SE Regions</i> | <b>Forward Primer (5'-3')</b> | <b>Reverse Primer (5'-3')</b> |
|-------------------|-------------------------------|-------------------------------|
| Tgif1             | agtaaggttgagtcgggatttg        | tgccctccacaaagtgaataa         |
| Fgf2              | gcagcagtgttcttgcctttg         | gtgaggtgggcttgtttact          |
| Foxp1             | atgtggaacctctccactttac        | ccagtcctacagcattgat           |

**Supplementary Table 1. List of oligonucleotide sequences used in this study.** \* *m* denotes mouse genes. # SG denotes sense guide RNA and ASG denotes anti-sense guide RNA.

| <b>GWAS chromosome coordinates</b> | <b>GWAS ID</b> | <b>PubMed ID</b> | <b>Authors (et al.)</b> | <b>Journal</b> | <b>Trait</b>              | <b>Genes</b>                               | <b>hg19 co-ordinates</b> | <b>Rat enhancer co-ordinates</b> |
|------------------------------------|----------------|------------------|-------------------------|----------------|---------------------------|--------------------------------------------|--------------------------|----------------------------------|
| chr9_22115958_22115959             | rs2383207      | 20622881         | Gretarsdottir S         | Nat Genet      | Abdominal aortic aneurysm | CKDN2B, CDKN2A                             | chr9_22114267_22116382   | chr5_109036837_109039175         |
| chr5_39397131_39397132             | rs11959928     | 20383146         | Kottgen A               | Nat Genet      | Chronic kidney disease    | DAB2, C9                                   | chr5_39397114_39401158   | chr2_55707758_55711091           |
| chr1_15095147_150951477            | rs267734       | 20383146         | Kottgen A               | Nat Genet      | Chronic kidney disease    | SETDB1, LASS2, ANXA9, PRUNE, FAM63A, BNIPL | chr1_15094951_150952124  | chr2_190219397_190221430         |
| chr21_3559382_35593827             | rs28451064     | 26343387         | Nikpay M                | Nat Genet      | Coronary artery disease   | KCNE2                                      | chr21_3559306_35594753   | chr11_32159399_32162443          |
| chr9_2211528_22115286              | rs944797       | 21971053         | Takeuchi F              | Eur J Hum      | Coronary heart disease    | CDKN2A, CDKN2B                             | chr9_22114267_22116382   | chr5_109036837_109039175         |

|                         |            |          |            |               |                            |                            |                         |                            |
|-------------------------|------------|----------|------------|---------------|----------------------------|----------------------------|-------------------------|----------------------------|
|                         |            |          |            | Genet         |                            |                            |                         |                            |
| chr2_62713532_62713533  | rs6545946  | 22412388 | Kenny EE   | PLoS Genet    | Crohn's disease            | TMEM17, EHBP1, CPAMD8, AK3 | chr2_62712712_62716292  | chr14_10319761_1_103200563 |
| chr1_83220655_83220656  | rs11582609 | 26305897 | Iyengar SK | PLoS Genet    | Diabetic kidney disease    | intergenic                 | chr1_83217751_83221886  | chr2_246266690_246271012   |
| chr20_10965997_10965998 | rs1887320  | 25249183 | Lu X       | Hum Mol Genet | Diastolic blood pressure   | JAG1                       | chr20_10957868_10966395 | chr3_125541543_125548196   |
| chr9_22115104_22115105  | rs10965235 | 20601957 | Uno S      | Nat Genet     | Endometriosis              | CDKN2B AS                  | chr9_22114267_22116382  | chr5_109036837_109039175   |
| chr1_8150637_8150638    | rs72634258 | 26192919 | Liu JZ     | Nat Genet     | Inflammatory bowel disease | NR                         | chr1_8149972_8152812    | chr5_167965360_167968601   |
| chr9_22114468_22114469  | rs10733376 | 25256182 | Foroud T   | Stroke        | Intracranial aneurysm      | CDKN2B AS, ANRIL           | chr9_22114267_22116382  | chr5_109036837_109039175   |
| chr21_35593826_35593827 | rs28451064 | 26343387 | Nikpay M   | Nat Genet     | Myocardial infarction      | KCNE2                      | chr21_35593064_35594753 | chr11_32159399_32162443    |

|                           |            |          |             |           |                        |           |                           |                           |
|---------------------------|------------|----------|-------------|-----------|------------------------|-----------|---------------------------|---------------------------|
|                           |            |          |             |           |                        |           |                           |                           |
| chr13_102145559_102145560 | rs1335587  | 23251661 | Comuzzie AG | PLoS One  | Obesity-related traits | ITGBL1    | chr13_102123151_102146733 | chr15_108803525_108814397 |
| chr10_44458713_44458714   | rs898549   | 23251661 | Comuzzie AG | PLoS One  | Obesity-related traits | C10orf136 | chr10_44457081_44461770   | chr4_153840182_153845918  |
| chr14_94972241_94972242   | rs11627075 | 23251661 | Comuzzie AG | PLoS One  | Obesity-related traits | SERPINA12 | chr14_94972049_94977481   | chr6_128102375_128105662  |
| chr5_16913854_16913855    | rs17614462 | 23251661 | Comuzzie AG | PLoS One  | Obesity-related traits | MYO10     | chr5_16901265_16914607    | chr2_77201740_77210481    |
| chr5_131430117_131430118  | rs657075   | 24390342 | Okada Y     | Nature    | Rheumatoid arthritis   | CSF2, IL3 | chr5_131429842_131432784  | chr10_39641675_39644527   |
| chr5_131430117_131430118  | rs657075   | 22446963 | Okada Y     | Nat Genet | Rheumatoid arthritis   | CSF2      | chr5_131429842_131432784  | chr10_39641675_39644527   |
| chr10_63785088_63785089   | rs10821944 | 22446963 | Okada Y     | Nat Genet | Rheumatoid arthritis   | ARID5B    | chr10_63784082_63790216   | chr20_21238868_21245054   |

|                              |                 |          |                         |                            |                                 |            |                              |                              |
|------------------------------|-----------------|----------|-------------------------|----------------------------|---------------------------------|------------|------------------------------|------------------------------|
|                              |                 |          |                         |                            |                                 |            |                              |                              |
| chr1_20550929<br>7_205509298 | rs1815022<br>28 | 26606652 | Alarcon-<br>Riquelme ME | Arthritis<br>Rheumat<br>ol | Systemic lupus<br>erythematosus | DSTYK      | chr1_20550622<br>9_205515389 | chr13_44982874<br>_44986847  |
| chr20_1096599<br>7_10965998  | rs1887320       | 25249183 | Lu X                    | Hum Mol<br>Genet           | Systolic blood<br>pressure      | JAG1       | chr20_1095786<br>8_10966395  | chr3_125541543<br>_125548196 |
| chr2_12640740<br>_12640741   | rs1534422       | 19430480 | Barrett JC              | Nat<br>Genet               | Type 1 diabetes                 | intergenic | chr2_12629402<br>_12645547   | chr6_39702585_<br>39708724   |
| chr22_3058172<br>1_30581722  | rs5753037       | 19430480 | Barrett JC              | Nat<br>Genet               | Type 1 diabetes                 | intergenic | chr22_3058136<br>9_30583153  | chr14_84958839<br>_84960817  |
| chr10_7145228<br>4_71452285  | rs2812533       | 24509480 | Mahajan A               | Nat<br>Genet               | Type 2 diabetes                 | C10orf35   | chr10_7144747<br>6_71452665  | chr20_29456788<br>_29457999  |

**Supplementary Table 2: GWAS SNPs associated with AngII regulated enhancers. GWAS SNPs present in human sequences orthologous to rat enhancers were identified. Only diabetes and CVD associated SNPs are shown.**
